# Supplementary material
Source: HighWire-hosted journal article supplement (https://www.g3journal.org/content/suppl/2017/09/08/g3.117.300169)
Supplement: TableS1.pdf [file TableS1.pdf]

**S1 Table. Read counts other information for all individuals in the GBS library.**

| <b>Individual ID</b>     | <b>BioSample</b> | <b>Origin</b>                               | <b>Total</b> | <b>Retained</b> | <b>Assay AHMSY8D Genotype</b> |
|--------------------------|------------------|---------------------------------------------|--------------|-----------------|-------------------------------|
| 20100810_001_KFZ_001_011 | SAMN05725834     | Brazil Sao Luis                             | 592627       | 551239 (93%)    | G/G                           |
| 20100810_001_KFZ_001_014 | SAMN05725835     | Brazil Sao Luis                             | 897386       | 833202 (92%)    | G/G                           |
| 20100810_001_MNS_009_006 | SAMN05725836     | Brazil Cacador Santa Catarina               | 3420652      | 3038829 (88%)   | G/G                           |
| 20100810_001_MNS_009_007 | SAMN05725837     | Brazil Cacador Santa Catarina               | 921848       | 849507 (92%)    | G/G                           |
| 20100810_001_MNS_009_008 | SAMN05725838     | Brazil Cacador Santa Catarina               | 1279161      | 1160664 (90%)   | G/G                           |
| 20100810_001_MNS_009_010 | SAMN05725839     | Brazil Cacador Santa Catarina               | 2002951      | 1855594 (92%)   | G/T                           |
| 2011121_001_AA001_004    | SAMN05725840     | Azores Terceira                             | 2549374      | 2368958 (92%)   | G/G                           |
| 2011121_001_AA001_005    | SAMN05725841     | Azores Terceira                             | 3005289      | 2742045 (91%)   | G/G                           |
| 20130628_001_E_001_009   | SAMN05725842     | Vienna-7 Strain Moscamed Guatemala          | 1727035      | 1609751 (93%)   | G/T                           |
| 20130628_001_E_001_010   | SAMN05725843     | Vienna-7 Strain Moscamed Guatemala          | 1553212      | 1418741 (91%)   | G/T                           |
| 20130628_001_E_001_011   | SAMN05725844     | Vienna-7 Strain Moscamed Guatemala          | 1235388      | 1161740 (94%)   | G/T                           |
| 20130628_001_E_001_012   | SAMN05725845     | Vienna-7 Strain Moscamed Guatemala          | 1091020      | 1013986 (92%)   | G/T                           |
| 20130628_001_F_001_013   | SAMN05725846     | Vienna-7 Strain Moscamed Guatemala          | 1697034      | 1578366 (93%)   | T/T                           |
| 20130628_001_F_001_014   | SAMN05725847     | Vienna-7 Strain Moscamed Guatemala          | 2222363      | 2098573 (94%)   | T/T                           |
| 20130628_001_F_001_015   | SAMN05725848     | Vienna-7 Strain Moscamed Guatemala          | 1275653      | 1206533 (94%)   | T/T                           |
| 20130628_001_F_001_016   | SAMN05725849     | Vienna-7 Strain Moscamed Guatemala          | 2080534      | 1943550 (93%)   | T/T                           |
| 20130628_001_I_001_017   | SAMN05725850     | Vienna-8 Strain South Africa SIT Africa     | 1667572      | 1524201 (91%)   | G/T                           |
| 20130628_001_I_001_018   | SAMN05725851     | Vienna-8 Strain South Africa SIT Africa     | 1837878      | 1719455 (93%)   | G/T                           |
| 20130628_001_I_001_019   | SAMN05725852     | Vienna-8 Strain South Africa SIT Africa     | 1521211      | 1412882 (92%)   | G/T                           |
| 20130628_001_I_001_020   | SAMN05725853     | Vienna-8 Strain South Africa SIT Africa     | 900639       | 844495 (93%)    | G/T                           |
| 20130628_001_J_001_021   | SAMN05725854     | Vienna-8 Strain South Africa SIT Africa     | 1491727      | 1412678 (94%)   | T/T                           |
| 20130628_001_J_001_022   | SAMN05725855     | Vienna-8 Strain South Africa SIT Africa     | 1144423      | 1079312 (94%)   | T/T                           |
| 20130628_001_J_001_023   | SAMN05725856     | Vienna-8 Strain South Africa SIT Africa     | 1651100      | 1560516 (94%)   | T/T                           |
| 20130628_001_J_001_024   | SAMN05725857     | Vienna-8 Strain South Africa SIT Africa     | 1954392      | 1823354 (93%)   | T/T                           |
| 20130628_001_M_001_025   | SAMN05725858     | Vienna-8 Strain Mix 2006 Strain. Chile      | 867801       | 806887 (92%)    | G/T                           |
| 20130628_001_M_001_026   | SAMN05725859     | Vienna-8 Strain Mix 2006 Strain. Chile      | 1048860      | 967984 (92%)    | G/T                           |
| 20130628_001_M_001_027   | SAMN05725860     | Vienna-8 Strain Mix 2006 Strain. Chile      | 1614546      | 1503544 (93%)   | G/T                           |
| 20130628_001_M_001_028   | SAMN05725861     | Vienna-8 Strain Mix 2006 Strain. Chile      | 1010662      | 915691 (90%)    | G/T                           |
| 20130628_001_N_001_029   | SAMN05725862     | Vienna-8 Strain Mix 2006 Strain. Chile      | 1013656      | 947725 (93%)    | T/T                           |
| 20130628_001_N_001_030   | SAMN05725863     | Vienna-8 Strain Mix 2006 Strain. Chile      | 1452468      | 1354634 (93%)   | T/T                           |
| 20130628_001_N_001_031   | SAMN05725864     | Vienna-8 Strain Mix 2006 Strain. Chile      | 1806142      | 1700774 (94%)   | T/T                           |
| 20130628_001_N_001_032   | SAMN05725865     | Vienna-8 Strain Mix 2006 Strain. Chile      | 1501554      | 1431086 (95%)   | T/T                           |
| 20130628_001_S_001_033   | SAMN05725866     | Vienna-7 Mix 1999 Strain. Western Australia | 1721318      | 1623198 (94%)   | G/T                           |
| 20130628_001_S_001_034   | SAMN05725867     | Vienna-7 Mix 1999 Strain. Western Australia | 2090526      | 1954853 (93%)   | G/T                           |
| 20130628_001_S_001_035   | SAMN05725868     | Vienna-7 Mix 1999 Strain. Western Australia | 1224432      | 1153205 (94%)   | G/T                           |
| 20130628_001_S_001_036   | SAMN05725869     | Vienna-7 Mix 1999 Strain. Western Australia | 1624361      | 1523318 (93%)   | G/T                           |
| 20130628_001_T_001_037   | SAMN05725870     | Vienna-7 Mix 1999 Strain. Western Australia | 1075615      | 1004652 (93%)   | T/T                           |
| 20130628_001_T_001_038   | SAMN05725871     | Vienna-7 Mix 1999 Strain. Western Australia | 779122       | 731599 (93%)    | T/T                           |
| 20130628_001_T_001_039   | SAMN05725872     | Vienna-7 Mix 1999 Strain. Western Australia | 1060208      | 999308 (94%)    | T/T                           |
| 20130628_001_T_001_040   | SAMN05725873     | Vienna-7 Mix 1999 Strain. Western Australia | 628746       | 577493 (91%)    | T/T                           |
| 20130628_001_Y_001_041   | SAMN05725874     | Vienna-7 New Strain. Seibersdorf            | 488817       | 461270 (94%)    | G/T                           |

| Individual ID          | BioSample    | Origin                                                    | Total   | Retained      | Assay AHMSY8D Genotype |
|------------------------|--------------|-----------------------------------------------------------|---------|---------------|------------------------|
| 20130628_001_Y_001_042 | SAMN05725875 | Vienna-7 New Strain. Seibersdorf                          | 667744  | 583615 (87%)  | G/T                    |
| 20130628_001_Y_001_043 | SAMN05725876 | Vienna-7 New Strain. Seibersdorf                          | 1416323 | 1319020 (93%) | G/T                    |
| 20130628_001_Y_001_044 | SAMN05725877 | Vienna-7 New Strain. Seibersdorf                          | 1407113 | 1326614 (94%) | G/T                    |
| 20130628_001_Z_001_045 | SAMN05725878 | Vienna-7 New Strain. Seibersdorf                          | 875554  | 812640 (92%)  | T/T                    |
| 20130628_001_Z_001_046 | SAMN05725879 | Vienna-7 New Strain. Seibersdorf                          | 1306463 | 1243850 (95%) | T/T                    |
| 20130628_001_Z_001_047 | SAMN05725880 | Vienna-7 New Strain. Seibersdorf                          | 1541109 | 1453674 (94%) | T/T                    |
| 20130628_001_Z_001_048 | SAMN05725881 | Vienna-7 New Strain. Seibersdorf                          | 2138158 | 2010116 (94%) | T/T                    |
| 8F                     | SAMN05725882 | CDEFA                                                     | 2785569 | 2591048 (93%) | T/T                    |
| 8M                     | SAMN05725883 | HiMed                                                     | 2574976 | 2089626 (81%) | G/G                    |
| CDFA10                 | SAMN05725884 | CDEFA                                                     | 1703931 | 1581903 (92%) | G/T                    |
| CDFA11                 | SAMN05725885 | CDEFA                                                     | 1579076 | 1474251 (93%) | G/T                    |
| CDFA13                 | SAMN05725886 | CDEFA                                                     | 1077977 | 1005370 (93%) | G/T                    |
| CDFA14                 | SAMN05725887 | CDEFA                                                     | 1291375 | 1210231 (93%) | G/T                    |
| CDFA15                 | SAMN05725888 | CDEFA                                                     | 1840198 | 1733829 (94%) | G/T                    |
| CDFA16                 | SAMN05725889 | CDEFA                                                     | 2104798 | 1987399 (94%) | G/T                    |
| CDFA17                 | SAMN05725890 | CDEFA                                                     | 2008803 | 1903728 (94%) | G/T                    |
| CDFA1                  | SAMN05725891 | CDEFA                                                     | 1446839 | 1356710 (93%) | G/T                    |
| CDFA4                  | SAMN05725892 | CDEFA                                                     | 2093586 | 1976602 (94%) | G/T                    |
| CDFA5                  | SAMN05725893 | CDEFA                                                     | 1079025 | 1015913 (94%) | G/T                    |
| CDFA6                  | SAMN05725894 | CDEFA                                                     | 1460525 | 1379351 (94%) | G/T                    |
| CDFA8                  | SAMN05725895 | CDEFA                                                     | 1233232 | 1134970 (92%) | G/T                    |
| HIMed12                | SAMN05725896 | HiMed                                                     | 2012420 | 1887206 (93%) | G/G                    |
| HIMed13                | SAMN05725897 | HiMed                                                     | 1639148 | 1427295 (87%) | G/G                    |
| HIMed14                | SAMN05725898 | HiMed                                                     | 2714191 | 2499696 (92%) | G/G                    |
| HIMed15                | SAMN05725899 | HiMed                                                     | 999672  | 924865 (92%)  | G/G                    |
| HIMed16                | SAMN05725900 | HiMed                                                     | 1206472 | 1129843 (93%) | G/G                    |
| HIMed2                 | SAMN05725901 | HiMed                                                     | 3064319 | 2773667 (90%) | G/G                    |
| HIMed3                 | SAMN05725902 | HiMed                                                     | 1378705 | 1273176 (92%) | G/G                    |
| HIMed4                 | SAMN05725903 | HiMed                                                     | 1541580 | 1435665 (93%) | G/G                    |
| HIMed5                 | SAMN05725904 | HiMed                                                     | 1476654 | 1394658 (94%) | G/G                    |
| HIMed6                 | SAMN05725905 | HiMed                                                     | 1127347 | 1049800 (93%) | G/G                    |
| HIMed7                 | SAMN05725906 | HiMed                                                     | 1482483 | 1399220 (94%) | G/G                    |
| HIMed8                 | SAMN05725907 | HiMed                                                     | 1874859 | 1757179 (93%) | G/G                    |
| S01_14                 | SAMN05725908 | Guatemala San Juan Atoenango Finca Capetillo <sup>a</sup> | 1948783 | 1850428 (94%) | G/G                    |
| S01_16a                | SAMN05725909 | USA CA San Jose Santa Clara County <sup>a</sup>           | 1175077 | 1122113 (95%) | G/G                    |
| S01_17a                | SAMN05725910 | Vienna-8 Strain El Pino SIT Guatemala                     | 1310581 | 1245388 (95%) | T/T                    |
| S01_1                  | SAMN05725911 | Vienna-8 Strain El Pino SIT Guatemala                     | 904644  | 846079 (93%)  | T/T                    |
| S01_3                  | SAMN05725912 | Panama Chiriqui Province Boquete Bajo Mono                | 1210362 | 1115886 (92%) | G/G                    |
| S01_5                  | SAMN05725913 | USA HI Oahu Island                                        | 1537738 | 1440518 (93%) | G/G                    |
| S01_8                  | SAMN05725914 | USA CA Camarillo Ventura County <sup>a</sup>              | 2339704 | 2207090 (94%) | G/G                    |
| S01_9                  | SAMN05725915 | USA CA Camarillo Ventura County <sup>a</sup>              | 1809760 | 1707308 (94%) | G/G                    |

<sup>a</sup> Collected from active SIT release areas

| Individual ID | BioSample    | Origin                                                    | Total   | Retained      | Assay AHMSY8D Genotype |
|---------------|--------------|-----------------------------------------------------------|---------|---------------|------------------------|
| S02_16b       | SAMN05725916 | Vienna-8 Strain El Pino SIT Guatemala                     | 1609358 | 1515321 (94%) | G/T                    |
| S02_17b       | SAMN05725917 | Vienna-8 Strain El Pino SIT Guatemala                     | 1333829 | 1267602 (95%) | T/T                    |
| S02_18        | SAMN05725918 | Guatemala San Juan Atoenango Finca Capetillo <sup>a</sup> | 1719678 | 1575265 (91%) | G/G                    |
| S02_26        | SAMN05725919 | Panama Chiriqui Province Boquete Bajo Mono                | 1295507 | 1241994 (95%) | G/G                    |
| S02_34        | SAMN05725920 | USA HI Oahu Island                                        | 1600787 | 1481665 (92%) | G/G                    |
| S03_16c       | SAMN05725921 | Vienna-8 Strain El Pino SIT Guatemala                     | 691838  | 658353 (95%)  | G/T                    |
| S03_17c       | SAMN05725922 | Vienna-8 Strain El Pino SIT Guatemala                     | 905631  | 845154 (93%)  | T/T                    |
| S03_19        | SAMN05725923 | Guatemala San Juan Atoenango Finca Capetillo <sup>a</sup> | 1285515 | 1196690 (93%) | G/G                    |
| S03_27        | SAMN05725924 | Panama Chiriqui Province Boquete Bajo Mono                | 1243597 | 1164547 (93%) | G/G                    |
| S03_35        | SAMN05725925 | USA HI Oahu Island                                        | 2432042 | 2280836 (93%) | G/G                    |
| S03_S12_88    | SAMN05725926 | Spain CastellÃşn Plana Alta <sup>a</sup>                  | 2645570 | 2492651 (94%) | G/G                    |
| S03_S12_89    | SAMN05725927 | Spain CastellÃşn Plana Alta <sup>a</sup>                  | 3535606 | 3311643 (93%) | G/G                    |
| S03_S12_90    | SAMN05725928 | Spain CastellÃşn Plana Alta <sup>a</sup>                  | 2182977 | 2059037 (94%) | G/T                    |
| S03_S12_91    | SAMN05725929 | Spain CastellÃşn Plana Alta <sup>a</sup>                  | 1845870 | 1704786 (92%) | G/T                    |
| S03_S12_92    | SAMN05725930 | Spain CastellÃşn Plana Alta <sup>a</sup>                  | 1716711 | 1546522 (90%) | G/G                    |
| S03_S12_93    | SAMN05725931 | Spain CastellÃşn Plana Alta <sup>a</sup>                  | 1177570 | 1102251 (93%) | G/T                    |
| S03_S12_94    | SAMN05725932 | Spain CastellÃşn Plana Alta <sup>a</sup>                  | 1415587 | 1314503 (92%) | G/T                    |
| S03_S12_95    | SAMN05725933 | Spain CastellÃşn Plana Alta <sup>a</sup>                  | 1547558 | 1446943 (93%) | G/G                    |
| S03_S12_96    | SAMN05725934 | Spain CastellÃşn Plana Alta <sup>a</sup>                  | 2791660 | 2620379 (93%) | G/G                    |
| S04_16d       | SAMN05725935 | Vienna-8 Strain El Pino SIT Guatemala                     | 1064900 | 1008470 (94%) | G/T                    |
| S04_17d       | SAMN05725936 | Vienna-8 Strain El Pino SIT Guatemala                     | 920009  | 877561 (95%)  | T/T                    |
| S04_28        | SAMN05725937 | Panama Chiriqui Province Boquete Bajo Mono                | 1122796 | 1059461 (94%) | G/G                    |
| S04_36        | SAMN05725938 | USA HI Oahu Island                                        | 2225668 | 2107069 (94%) | G/G                    |
| S04_S08_16    | SAMN05725939 | Morocco Marrakesh                                         | 5673870 | 4899547 (86%) | G/G                    |
| S04_S08_18    | SAMN05725940 | Morocco Marrakesh                                         | 2159270 | 1936597 (89%) | G/G                    |
| S04_S08_19    | SAMN05725941 | Morocco Marrakesh                                         | 1656947 | 1540832 (92%) | G/G                    |
| S04_S08_20    | SAMN05725942 | Morocco Marrakesh                                         | 1400183 | 1313605 (93%) | G/G                    |
| S04_S08_21    | SAMN05725943 | Mozambique Maputo                                         | 2395717 | 2205916 (92%) | G/G                    |
| S04_S08_24    | SAMN05725944 | Mozambique Maputo                                         | 1443061 | 1358599 (94%) | G/G                    |
| S04_S08_25    | SAMN05725945 | Mozambique Maputo                                         | 2539989 | 2373925 (93%) | G/G                    |
| S04_S08_48    | SAMN05725946 | South Africa Varnam Farm                                  | 2081261 | 1920816 (92%) | G/G                    |
| S04_S08_49    | SAMN05725947 | South Africa Varnam Farm                                  | 1952944 | 1830515 (93%) | G/G                    |
| S04_S08_50    | SAMN05725948 | South Africa Varnam Farm                                  | 1977466 | 1849416 (93%) | G/G                    |
| S04_S08_51    | SAMN05725949 | South Africa Varnam Farm                                  | 2143045 | 2016014 (94%) | G/G                    |
| S04_S08_55    | SAMN05725950 | Western Australia Perth West Swan <sup>a</sup>            | 1153403 | 981104 (85%)  | G/G                    |
| S04_S08_56    | SAMN05725951 | Western Australia Perth West Swan <sup>a</sup>            | 1220248 | 1121684 (91%) | G/G                    |
| S04_S08_57    | SAMN05725952 | Western Australia Perth West Swan <sup>a</sup>            | 756636  | 700537 (92%)  | G/G                    |
| S05_16e       | SAMN05725953 | Vienna-8 Strain El Pino SIT Guatemala                     | 867810  | 814053 (93%)  | G/T                    |
| S05_21        | SAMN05725954 | Guatemala San Juan Atoenango Finca Capetillo <sup>a</sup> | 1748217 | 1648367 (94%) | G/G                    |
| S05_29        | SAMN05725955 | Panama Chiriqui Province Boquete Bajo Mono                | 1209910 | 1140517 (94%) | G/G                    |
| S06_44        | SAMN05725956 | Vienna-8 Strain El Pino SIT Guatemala                     | 643736  | 616976 (95%)  | G/T                    |

<sup>a</sup> Collected from active SIT release areas

| Individual ID | BioSample    | Origin                                       | Total   | Retained      | Assay AHMSY8D Genotype |
|---------------|--------------|----------------------------------------------|---------|---------------|------------------------|
| S08_S17_100   | SAMN05725957 | Spain Valencia Camp de Morvedre <sup>a</sup> | 3399629 | 3161497 (92%) | G/T                    |
| S08_S17_101   | SAMN05725958 | Spain Valencia Camp de Morvedre <sup>a</sup> | 598491  | 559703 (93%)  | G/T                    |
| S08_S17_102   | SAMN05725959 | Spain Valencia Camp de Morvedre <sup>a</sup> | 1437473 | 1347375 (93%) | G/G                    |
| S08_S17_103   | SAMN05725960 | Spain Valencia Camp de Morvedre <sup>a</sup> | 1495852 | 1406815 (94%) | G/G                    |
| S08_S17_104   | SAMN05725961 | Spain Valencia Camp de Morvedre <sup>a</sup> | 463999  | 438049 (94%)  | G/T                    |
| S08_S17_105   | SAMN05725962 | Spain Valencia Camp de Morvedre <sup>a</sup> | 1443954 | 1359625 (94%) | G/T                    |
| S08_S17_106   | SAMN05725963 | Spain Valencia Camp de Morvedre <sup>a</sup> | 1492664 | 1386793 (92%) | G/G                    |
| S08_S17_107   | SAMN05725964 | Spain Valencia Camp de Morvedre <sup>a</sup> | 1543074 | 1435666 (93%) | G/T                    |
| S08_S17_98    | SAMN05725965 | Spain Valencia Camp de Morvedre <sup>a</sup> | 2507092 | 2363446 (94%) | G/T                    |
| S08_S17_99    | SAMN05725966 | Spain Valencia Camp de Morvedre <sup>a</sup> | 1601361 | 1432663 (89%) | G/T                    |
| S09_S13_27    | SAMN05725967 | Mozambique Mitucue Catholic Mission          | 2532145 | 2356698 (93%) | G/G                    |
| S09_S13_28    | SAMN05725968 | Mozambique Mitucue Catholic Mission          | 2287622 | 1944097 (84%) | G/G                    |
| S09_S13_29    | SAMN05725969 | Mozambique Mitucue Catholic Mission          | 1500432 | 1322501 (88%) | G/G                    |
| S09_S13_30    | SAMN05725970 | Mozambique Mitucue Catholic Mission          | 1065541 | 998281 (93%)  | G/G                    |
| S09_S13_38    | SAMN05725971 | South Africa Bonnievale                      | 1689731 | 1578944 (93%) | G/G                    |
| S09_S13_39    | SAMN05725972 | South Africa Bonnievale                      | 3967839 | 3689950 (92%) | G/G                    |
| S09_S13_40    | SAMN05725973 | South Africa Bonnievale                      | 1795073 | 1671892 (93%) | G/G                    |
| S09_S13_41    | SAMN05725974 | South Africa Bonnievale                      | 1568257 | 1482197 (94%) | G/G                    |
| S09_S13_42    | SAMN05725975 | South Africa Bonnievale                      | 2167389 | 2034380 (93%) | G/G                    |
| S09_S13_43    | SAMN05725976 | South Africa Riebeek Kasteel                 | 2280718 | 2131968 (93%) | G/G                    |
| S09_S13_44    | SAMN05725977 | South Africa Riebeek Kasteel                 | 2691196 | 2473694 (91%) | G/G                    |
| S09_S13_45    | SAMN05725978 | South Africa Riebeek Kasteel                 | 2625435 | 2448871 (93%) | G/G                    |
| S09_S13_47    | SAMN05725980 | South Africa Riebeek Kasteel                 | 2487272 | 2335632 (93%) | G/G                    |
| S16_S25_58    | SAMN05725981 | Madeira Island North Coast <sup>a</sup>      | 613758  | 582100 (94%)  | G/T                    |
| S16_S25_59    | SAMN05725982 | Madeira Island North Coast <sup>a</sup>      | 966889  | 913652 (94%)  | G/T                    |
| S16_S25_60    | SAMN05725983 | Madeira Island North Coast <sup>a</sup>      | 1831821 | 1730940 (94%) | G/G                    |
| S16_S25_61    | SAMN05725984 | Madeira Island North Coast <sup>a</sup>      | 2074564 | 1946363 (93%) | G/G                    |
| S16_S25_62    | SAMN05725985 | Madeira Island North Coast <sup>a</sup>      | 939030  | 894776 (95%)  | G/G                    |
| S16_S25_63    | SAMN05725986 | Madeira Island North Coast <sup>a</sup>      | 996063  | 919352 (92%)  | G/T                    |
| S16_S25_64    | SAMN05725987 | Madeira Island North Coast <sup>a</sup>      | 1494814 | 1392312 (93%) | G/G                    |
| S16_S25_65    | SAMN05725988 | Madeira Island North Coast <sup>a</sup>      | 1096931 | 1027014 (93%) | G/T                    |
| S16_S25_66    | SAMN05725989 | Madeira Island North Coast <sup>a</sup>      | 541380  | 505834 (93%)  | G/G                    |
| S16_S25_67    | SAMN05725990 | Madeira Island North Coast <sup>a</sup>      | 671363  | 624838 (93%)  | G/T                    |
| S27_2         | SAMN05725991 | Honduras Trujillo Colon                      | 2580459 | 2387159 (92%) | G/G                    |
| S28_22        | SAMN05725992 | Honduras Trujillo Colon                      | 1037512 | 972860 (93%)  | G/G                    |
| S29_23        | SAMN05725993 | Honduras Trujillo Colon                      | 1329212 | 1263267 (95%) | G/G                    |
| S29_S30_31    | SAMN05725994 | Reunion Island Ligne Paradis                 | 2098510 | 1957428 (93%) | G/G                    |
| S29_S30_32    | SAMN05725995 | Reunion Island Ligne Paradis                 | 2152001 | 2019919 (93%) | G/G                    |
| S30_24        | SAMN05725996 | Honduras Trujillo Colon                      | 2132509 | 1997408 (93%) | G/G                    |
| S31_25        | SAMN05725997 | Honduras Trujillo Colon                      | 3382497 | 3151705 (93%) | G/G                    |
| S04_S08_33    | SAMN05726002 | Senegal Keur Moussa                          | 2360349 | 2228904 (94%) | G/G                    |

<sup>a</sup> Collected from active SIT release areas

| Individual ID | BioSample    | Origin              | Total   | Retained      | Assay AHMSY8D Genotype |
|---------------|--------------|---------------------|---------|---------------|------------------------|
| S04_S08_34    | SAMN05726003 | Senegal Keur Moussa | 4500413 | 4221251 (93%) | G/G                    |
| S04_S08_35    | SAMN05726004 | Senegal Keur Moussa | 4229508 | 3950606 (93%) | G/G                    |
| S04_S08_36    | SAMN05726005 | Senegal Keur Moussa | 2021251 | 1703378 (84%) | G/G                    |
| S04_S08_37    | SAMN05726006 | Senegal Keur Moussa | 1948599 | 1817412 (93%) | G/G                    |
| 8_3_2_1F      | SAMN05727687 | Mapping population  | 2941650 | 2732872 (92%) | G/T                    |
| 8_3_2_1M      | SAMN05727688 | Mapping population  | 2913257 | 2728331 (93%) | G/T                    |
| 8_3_2_2F      | SAMN05727689 | Mapping population  | 2500136 | 2028246 (81%) | G/T                    |
| 8_3_2_2M      | SAMN05727690 | Mapping population  | 3047766 | 1869400 (61%) | G/T                    |
| 8_3_2_5F      | SAMN05727691 | Mapping population  | 2036686 | 1644757 (80%) | G/T                    |
| 8_3_2_5M      | SAMN05727692 | Mapping population  | 2894450 | 2361683 (81%) | G/T                    |
| 8_3_2F        | SAMN05727693 | Mapping population  | 2672412 | 2488526 (93%) | T/T                    |
| 8_3_2M        | SAMN05727694 | HiMed               | 2858875 | 2628710 (91%) | G/G                    |
| 8_3F          | SAMN05727695 | Mapping population  | 4837377 | 4484323 (92%) | G/T                    |
| 8_3M          | SAMN05727696 | Mapping population  | 3371578 | 3118376 (92%) | G/T                    |
| B8_3_2_1_10M  | SAMN05727697 | Mapping population  | 1365733 | 1083551 (79%) | T/T                    |
| B8_3_2_1_11M  | SAMN05727698 | Mapping population  | 2034085 | 1627945 (80%) | G/T                    |
| B8_3_2_1_12M  | SAMN05727699 | Mapping population  | 1790807 | 1518892 (84%) | G/T                    |
| B8_3_2_1_13M  | SAMN05727700 | Mapping population  | 1405218 | 1139920 (81%) | G/G                    |
| B8_3_2_1_14M  | SAMN05727701 | Mapping population  | 2205941 | 1787339 (81%) | G/T                    |
| B8_3_2_1_15M  | SAMN05727702 | Mapping population  | 2671415 | 2140710 (80%) | G/G                    |
| B8_3_2_1_16M  | SAMN05727703 | Mapping population  | 3260614 | 2424495 (74%) | G/G                    |
| B8_3_2_1_18M  | SAMN05727704 | Mapping population  | 2402772 | 1882473 (78%) | G/T                    |
| B8_3_2_1_20M  | SAMN05727705 | Mapping population  | 1602117 | 1323837 (82%) | G/T                    |
| B8_3_2_1_21F  | SAMN05727706 | Mapping population  | 256926  | 87285 (33%)   | No Call                |
| B8_3_2_1_21M  | SAMN05727707 | Mapping population  | 1889671 | 1540837 (81%) | G/G                    |
| B8_3_2_1_23M  | SAMN05727708 | Mapping population  | 2415767 | 1982851 (82%) | G/T                    |
| B8_3_2_1_24M  | SAMN05727709 | Mapping population  | 1982826 | 1668960 (84%) | G/T                    |
| B8_3_2_1_26M  | SAMN05727710 | Mapping population  | 2187415 | 1821334 (83%) | G/T                    |
| B8_3_2_1_2F   | SAMN05727711 | Mapping population  | 6495095 | 4799064 (73%) | G/G                    |
| B8_3_2_1_30F  | SAMN05727712 | Mapping population  | 381472  | 313076 (82%)  | G/G                    |
| B8_3_2_1_7M   | SAMN05727713 | Mapping population  | 2894240 | 2358772 (81%) | G/T                    |
| B8_3_2_1_8M   | SAMN05727714 | Mapping population  | 2296871 | 1768730 (77%) | G/G                    |
| B8_3_2_1_9M   | SAMN05727715 | Mapping population  | 2703425 | 2118762 (78%) | G/G                    |
| B8_3_2_2_10M  | SAMN05727716 | Mapping population  | 2474885 | 2038947 (82%) | G/T                    |
| B8_3_2_2_17M  | SAMN05727717 | Mapping population  | 2529962 | 2146993 (84%) | G/T                    |
| B8_3_2_2_18M  | SAMN05727718 | Mapping population  | 1884957 | 1581003 (83%) | G/T                    |
| B8_3_2_2_19M  | SAMN05727719 | Mapping population  | 1843719 | 1594770 (86%) | G/T                    |
| B8_3_2_2_1F   | SAMN05727720 | Mapping population  | 462594  | 350306 (75%)  | No Call                |
| B8_3_2_2_20F  | SAMN05727721 | Mapping population  | 1912156 | 1620416 (84%) | G/G                    |
| B8_3_2_2_25F  | SAMN05727722 | Mapping population  | 5208936 | 4052703 (77%) | G/T                    |
| B8_3_2_2_29M  | SAMN05727723 | Mapping population  | 2233081 | 1742756 (78%) | G/T                    |

| Individual ID | BioSample    | Origin             | Total   | Retained      | Assay AHMSY8D Genotype |
|---------------|--------------|--------------------|---------|---------------|------------------------|
| B8_3_2_2_33M  | SAMN05727724 | Mapping population | 2184584 | 1764560 (80%) | G/G                    |
| B8_3_2_2_7M   | SAMN05727725 | Mapping population | 3180504 | 2251814 (70%) | No Call                |
| B8_3_2_5_10F  | SAMN05727726 | Mapping population | 3293317 | 3071228 (93%) | G/T                    |
| B8_3_2_5_10M  | SAMN05727727 | Mapping population | 3043529 | 2473708 (81%) | G/T                    |
| B8_3_2_5_11F  | SAMN05727728 | Mapping population | 857033  | 806077 (94%)  | G/G                    |
| B8_3_2_5_11M  | SAMN05727729 | Mapping population | 4307523 | 3478879 (80%) | G/G                    |
| B8_3_2_5_16M  | SAMN05727730 | Mapping population | 2240143 | 2084099 (93%) | G/T                    |
| B8_3_2_5_18M  | SAMN05727731 | Mapping population | 1919964 | 1781499 (92%) | G/T                    |
| B8_3_2_5_19F  | SAMN05727732 | Mapping population | 2381024 | 2245349 (94%) | G/T                    |
| B8_3_2_5_1F   | SAMN05727733 | Mapping population | 2658815 | 2457947 (92%) | G/T                    |
| B8_3_2_5_1M   | SAMN05727734 | Mapping population | 2959998 | 2444722 (82%) | G/T                    |
| B8_3_2_5_20M  | SAMN05727735 | Mapping population | 7970101 | 6816124 (85%) | G/G                    |
| B8_3_2_5_21M  | SAMN05727736 | Mapping population | 3809804 | 3400647 (89%) | G/T                    |
| B8_3_2_5_2F   | SAMN05727737 | Mapping population | 1213307 | 1138933 (93%) | G/G                    |
| B8_3_2_5_2M   | SAMN05727738 | Mapping population | 2455246 | 2025460 (82%) | G/G                    |
| B8_3_2_5_36F  | SAMN05727739 | Mapping population | 3494981 | 3257786 (93%) | G/T                    |
| B8_3_2_5_39F  | SAMN05727740 | Mapping population | 19686   | 7166 (36%)    | No Call                |
| B8_3_2_5_3M   | SAMN05727741 | Mapping population | 3273164 | 2724779 (83%) | G/G                    |
| B8_3_2_5_44F  | SAMN05727742 | Mapping population | 6018679 | 5169118 (85%) | No Call                |
| B8_3_2_5_47F  | SAMN05727743 | Mapping population | 2490682 | 2223007 (89%) | G/T                    |
| B8_3_2_5_48F  | SAMN05727744 | Mapping population | 3047079 | 2820764 (92%) | G/T                    |
| B8_3_2_5_4M   | SAMN05727745 | Mapping population | 3764060 | 3139155 (83%) | G/T                    |
| B8_3_2_5_5M   | SAMN05727746 | Mapping population | 3810053 | 2959813 (77%) | G/T                    |
| B8_3_2_5_6M   | SAMN05727747 | Mapping population | 3588630 | 2929143 (81%) | G/T                    |
| B8_3_2_5_7F   | SAMN05727748 | Mapping population | 4353600 | 4033701 (92%) | G/T                    |
| B8_3_2_5_7M   | SAMN05727749 | Mapping population | 2073687 | 1764352 (85%) | G/T                    |
| B8_3_2_5_8M   | SAMN05727750 | Mapping population | 1639621 | 1281683 (78%) | G/G                    |
| B8_3_2_5_9M   | SAMN05727751 | Mapping population | 3549326 | 2942248 (82%) | G/G                    |
| W8_3_2_1_10M  | SAMN05727752 | Mapping population | 3633292 | 2755439 (75%) | T/T                    |
| W8_3_2_1_11M  | SAMN05727753 | Mapping population | 4262999 | 3353459 (78%) | T/T                    |
| W8_3_2_1_12M  | SAMN05727754 | Mapping population | 4322232 | 3230052 (74%) | T/T                    |
| W8_3_2_1_13M  | SAMN05727755 | Mapping population | 5521555 | 4389289 (79%) | No Call                |
| W8_3_2_1_14M  | SAMN05727756 | Mapping population | 3632687 | 2841977 (78%) | T/T                    |
| W8_3_2_1_15M  | SAMN05727757 | Mapping population | 2582761 | 2072238 (80%) | T/T                    |
| W8_3_2_1_16M  | SAMN05727758 | Mapping population | 4090905 | 3166399 (77%) | T/T                    |
| W8_3_2_1_1M   | SAMN05727759 | Mapping population | 4288480 | 2565157 (59%) | T/T                    |
| W8_3_2_1_2M   | SAMN05727760 | Mapping population | 3948054 | 2961934 (75%) | T/T                    |
| W8_3_2_1_3M   | SAMN05727761 | Mapping population | 2707350 | 2164414 (79%) | T/T                    |
| W8_3_2_1_4M   | SAMN05727762 | Mapping population | 2041677 | 1638856 (80%) | T/T                    |
| W8_3_2_1_5M   | SAMN05727763 | Mapping population | 3033032 | 2319803 (76%) | T/T                    |
| W8_3_2_1_6M   | SAMN05727764 | Mapping population | 3027864 | 2395716 (79%) | T/T                    |

| Individual ID | BioSample    | Origin             | Total   | Retained      | Assay AHMSY8D Genotype |
|---------------|--------------|--------------------|---------|---------------|------------------------|
| W8_3_2_1_7M   | SAMN05727765 | Mapping population | 2840572 | 2271641 (79%) | T/T                    |
| W8_3_2_1_8M   | SAMN05727766 | Mapping population | 3548919 | 2832074 (79%) | T/T                    |
| W8_3_2_1_9M   | SAMN05727767 | Mapping population | 3922526 | 2752409 (70%) | T/T                    |
| W8_3_2_2_1F   | SAMN05727768 | Mapping population | 2304322 | 1841230 (79%) | T/T                    |
| W8_3_2_2_2F   | SAMN05727769 | Mapping population | 1305260 | 1100085 (84%) | No Call                |
| W8_3_2_2_3F   | SAMN05727770 | Mapping population | 1003775 | 846307 (84%)  | T/T                    |
| W8_3_2_2_4F   | SAMN05727771 | Mapping population | 2383444 | 1962463 (82%) | T/T                    |
| W8_3_2_2_5F   | SAMN05727772 | Mapping population | 2947244 | 2247423 (76%) | T/T                    |
| W8_3_2_2_6F   | SAMN05727773 | Mapping population | 1867467 | 1446740 (77%) | T/T                    |
| W8_3_2_2_6M   | SAMN05727774 | Mapping population | 2408257 | 1997786 (82%) | T/T                    |
| W8_3_2_2_7F   | SAMN05727775 | Mapping population | 1716867 | 1463539 (85%) | T/T                    |
| W8_3_2_2_8F   | SAMN05727776 | Mapping population | 2359744 | 1890746 (80%) | T/T                    |
| W8_3_2_2_9F   | SAMN05727777 | Mapping population | 1319579 | 1062245 (80%) | T/T                    |
| W8_3_2_5_10F  | SAMN05727778 | Mapping population | 2508510 | 1975705 (78%) | T/T                    |
| W8_3_2_5_11F  | SAMN05727779 | Mapping population | 2410671 | 1933448 (80%) | T/T                    |
| W8_3_2_5_11M  | SAMN05727780 | Mapping population | 3033822 | 2421430 (79%) | No Call                |
| W8_3_2_5_12M  | SAMN05727781 | Mapping population | 1254414 | 986027 (78%)  | T/T                    |
| W8_3_2_5_13M  | SAMN05727782 | Mapping population | 2770878 | 2038340 (73%) | T/T                    |
| W8_3_2_5_15M  | SAMN05727783 | Mapping population | 3189742 | 2494739 (78%) | T/T                    |
| W8_3_2_5_16M  | SAMN05727784 | Mapping population | 2979475 | 2408543 (80%) | T/T                    |
| W8_3_2_5_17M  | SAMN05727785 | Mapping population | 3920538 | 3134875 (79%) | T/T                    |
| W8_3_2_5_1F   | SAMN05727786 | Mapping population | 2309898 | 1927067 (83%) | T/T                    |
| W8_3_2_5_1M   | SAMN05727787 | Mapping population | 1609145 | 1272560 (79%) | T/T                    |
| W8_3_2_5_2F   | SAMN05727788 | Mapping population | 2454374 | 2063575 (84%) | T/T                    |
| W8_3_2_5_2M   | SAMN05727789 | Mapping population | 4832781 | 3755998 (77%) | T/T                    |
| W8_3_2_5_3F   | SAMN05727790 | Mapping population | 2177120 | 1780385 (81%) | T/T                    |
| W8_3_2_5_3M   | SAMN05727791 | Mapping population | 4150087 | 3295750 (79%) | T/T                    |
| W8_3_2_5_4F   | SAMN05727792 | Mapping population | 1900085 | 1616996 (85%) | T/T                    |
| W8_3_2_5_4M   | SAMN05727793 | Mapping population | 5627371 | 4138542 (73%) | T/T                    |
| W8_3_2_5_5F   | SAMN05727794 | Mapping population | 1622242 | 1142554 (70%) | T/T                    |
| W8_3_2_5_5M   | SAMN05727795 | Mapping population | 5639616 | 4123686 (73%) | T/T                    |
| W8_3_2_5_6F   | SAMN05727796 | Mapping population | 2166229 | 1711359 (79%) | T/T                    |
| W8_3_2_5_6M   | SAMN05727797 | Mapping population | 4479477 | 3254093 (72%) | T/T                    |
| W8_3_2_5_7F   | SAMN05727798 | Mapping population | 2168339 | 1762066 (81%) | T/T                    |
| W8_3_2_5_7M   | SAMN05727799 | Mapping population | 4913498 | 3766600 (76%) | T/T                    |
| W8_3_2_5_8F   | SAMN05727800 | Mapping population | 1229450 | 989863 (80%)  | T/T                    |
| W8_3_2_5_8M   | SAMN05727801 | Mapping population | 4304956 | 3447530 (80%) | T/T                    |
| W8_3_2_5_9M   | SAMN05727802 | Mapping population | 3849008 | 3053719 (79%) | T/T                    |
